# Supplementary material
Source: PubMed Central journal article supplement (PMC4200292)
Supplement: supp_M114.578492_jbc.M114.578492-1.pdf [file supp_M114.578492_jbc.M114.578492-1.pdf]

## Supplemental materials

### Suppl. experimental procedures

**Solutions for Ca<sup>2+</sup> Imaging.** The standard solutions with (Ca2) or without (Ca0) calcium were used for cell imaging studies. The chemical composition of the solutions is summarized in Table S1. The osmolality of imaging solution was  $319 \pm 7$  mOsm. The pH of imaging solutions was 7.35, adjusted by sodium hydroxide. Gd<sup>3+</sup> was added as GdCl<sub>3</sub>.

### Supplemental figure legends

**Suppl. Fig. S1. Validation of effective mRNA silencing in HUVECs.** RT-PCRs and quantitative-PCRs were performed using gene-specific primers. (A) Representative RT-PCR results confirm siRNA-mediated gene silencing of STIM1 in HUVECs. The mRNA levels of GAPDH from individual samples were examined to verify the application of equal amount of total RNAs for RT-PCR assay. M: DNA markers; Ctl: control; NT: non-targeting. (B) Quantitative-PCR analysis of STIM1 expression at the mRNA level indicates effective silencing of STIM1 by STIM1-siRNA. KD: knocking-down. (C) Representative RT-PCR data show specific silencing of the Orai genes in cells treated with targeting siRNAs. GAPDH mRNA levels were examined to verify the equal loading of RT-PCR assay. (D - F) Bar graphs indicate relative mRNA levels of Orai1 (D), Orai2 (E), and Orai3 (F) from four groups of samples: control HUVECs, HUVECs treated with Orai1-siRNA (O1-KD), Orai2-siRNA (O2-KD), or Orai3-siRNA (O3-KD).

**Suppl. Fig. S2. Endogenous expression of Orai2 or Orai3 proteins is not detectable in HUVECs.** Representative Western blot results with three different anti-Orai2 antibodies and two different anti-Orai3 antibodies are shown. Cells transfected with human Orai2 (left) or Orai3 plasmids (right) were used as positive controls and the corresponding cell lysates were loaded with (1:10, lane 2 and 1:100, lane 3) or without dilutions (lane 1). Cell lysates from untransfected HUVECs were loaded into lane 4. All the antibodies could effectively detect the corresponding, exogenous Orai proteins. MW: molecular weight.

### Supplemental tables

**Table S1.** Standard Solutions (all concentrations in mM)

| Solution          | Ca2 | Ca0 |
|-------------------|-----|-----|
| NaCl              | 155 | 153 |
| KCl               | 4.5 | 4.5 |
| CaCl <sub>2</sub> | 2   | 0   |
| MgCl <sub>2</sub> | 1   | 3   |
| EGTA              | 0   | 1   |
| HEPES             | 5   | 5   |
| D-glucose         | 10  | 10  |

**Table S2.** Mean Values, Standard Error of the Mean (SEM) and Sample Size (*n*) of Experiments

| <b>Figure 1G, Peak <math>[Ca^{2+}]_i</math> (nM)</b>                                   |      |     |                         |
|----------------------------------------------------------------------------------------|------|-----|-------------------------|
|                                                                                        | Mean | SEM | <i>n</i> (cell numbers) |
| 1 $\mu$ M histamine in Ca2                                                             | 97   | 7   | 179                     |
| 1 $\mu$ M histamine in Ca0                                                             | 97   | 13  | 93                      |
| 10 $\mu$ M histamine in Ca2                                                            | 223  | 6   | 278                     |
| 10 $\mu$ M histamine in Ca0                                                            | 191  | 11  | 135                     |
| 100 $\mu$ M histamine in Ca2                                                           | 278  | 4   | 813                     |
| 100 $\mu$ M histamine in Ca0                                                           | 256  | 12  | 98                      |
| <b>Figure 1H, Sustained <math>[Ca^{2+}]_i</math> (nM), 4 min after His application</b> |      |     |                         |
|                                                                                        | Mean | SEM | <i>n</i> (cell numbers) |
| 1 $\mu$ M histamine in Ca2                                                             | 88   | 6   | 179                     |
| 1 $\mu$ M histamine in Ca0                                                             | 21   | 1   | 93                      |
| 10 $\mu$ M histamine in Ca2                                                            | 126  | 4   | 278                     |
| 10 $\mu$ M histamine in Ca0                                                            | 19   | 1   | 135                     |
| 100 $\mu$ M histamine in Ca2                                                           | 115  | 2   | 813                     |
| 100 $\mu$ M histamine in Ca0                                                           | 24   | 1   | 98                      |
| <b>Figure 2J, Peak <math>[Ca^{2+}]_i</math> (nM)</b>                                   |      |     |                         |
|                                                                                        | Mean | SEM | <i>n</i> (cell numbers) |
| 10 $\mu$ M histamine in Ca0                                                            | 191  | 11  | 135                     |
| 10 $\mu$ M His in Ca0, Dip                                                             | 63   | 2   | 102                     |
| 10 $\mu$ M His in Ca0, FEX                                                             | 60   | 2   | 138                     |
| <b>Figure 2J, Sustained <math>[Ca^{2+}]_i</math> (nM), 4 min after His application</b> |      |     |                         |
|                                                                                        | Mean | SEM | <i>n</i> (cell numbers) |
| 10 $\mu$ M histamine in Ca0                                                            | 19   | 1   | 135                     |
| 10 $\mu$ M His in Ca0, Dip                                                             | 38   | 1   | 102                     |
| 10 $\mu$ M His in Ca0, FEX                                                             | 28   | 1   | 138                     |
| <b>Figure 2K, Peak <math>[Ca^{2+}]_i</math> (nM)</b>                                   |      |     |                         |
|                                                                                        | Mean | SEM | <i>n</i> (cell numbers) |
| 10 $\mu$ M histamine in Ca2                                                            | 223  | 6   | 278                     |
| 10 $\mu$ M His in Ca2, Dip                                                             | 45   | 1   | 131                     |
| 10 $\mu$ M His in Ca2, FEX                                                             | 62   | 3   | 264                     |

| <b>Figure 2K, Sustained <math>[Ca^{2+}]_i</math> (nM), 4 min after His application</b>         |      |     |                         |
|------------------------------------------------------------------------------------------------|------|-----|-------------------------|
|                                                                                                | Mean | SEM | <i>n</i> (cell numbers) |
| 10 $\mu$ M histamine in Ca2                                                                    | 126  | 4   | 278                     |
| 10 $\mu$ M His in Ca2, Dip                                                                     | 39   | 1   | 131                     |
| 10 $\mu$ M His in Ca2, FEX                                                                     | 57   | 3   | 264                     |
| <b>Figure 2L, Peak <math>[Ca^{2+}]_i</math> (nM)</b>                                           |      |     |                         |
|                                                                                                | Mean | SEM | <i>n</i> (cell numbers) |
| 2 $\mu$ M TG in Ca2                                                                            | 149  | 6   | 134                     |
| 2 $\mu$ M TG in Ca2, Dip                                                                       | 183  | 8   | 132                     |
| 2 $\mu$ M TG in Ca2, FEX                                                                       | 165  | 8   | 130                     |
| <b>Figure 2L, Sustained <math>[Ca^{2+}]_i</math> (nM), 4 min after TG application</b>          |      |     |                         |
|                                                                                                | Mean | SEM | <i>n</i> (cell numbers) |
| 2 $\mu$ M TG in Ca2                                                                            | 137  | 5   | 134                     |
| 2 $\mu$ M TG in Ca2, Dip                                                                       | 174  | 8   | 132                     |
| 2 $\mu$ M TG in Ca2, FEX                                                                       | 154  | 8   | 130                     |
| <b>Figure 3F, Sustained <math>[Ca^{2+}]_i</math> (nM) with TG, 5 min after Ca2 application</b> |      |     |                         |
|                                                                                                | Mean | SEM | <i>n</i> (cell numbers) |
| Ca2                                                                                            | 155  | 5   | 303                     |
| Ca2 + Gd <sup>3+</sup>                                                                         | 74   | 5   | 92                      |
| Ca2 + 2-APB                                                                                    | 61   | 4   | 69                      |
| Ca2 + SKF96365                                                                                 | 48   | 3   | 68                      |
| Ca2 + BTP2                                                                                     | 58   | 3   | 64                      |
| <b>Figure 3L, Sustained <math>[Ca^{2+}]_i</math> (nM), 4 min after His application</b>         |      |     |                         |
|                                                                                                | Mean | SEM | <i>n</i> (cell numbers) |
| 100 $\mu$ M histamine in Ca2                                                                   | 115  | 2   | 813                     |
| 100 $\mu$ M His in Ca2, Gd <sup>3+</sup>                                                       | 74   | 5   | 147                     |
| 100 $\mu$ M His in Ca2, 2-APB                                                                  | 33   | 2   | 115                     |
| 100 $\mu$ M His in Ca2, SKF96365                                                               | 78   | 3   | 252                     |
| 100 $\mu$ M His in Ca2, BTP2                                                                   | 65   | 2   | 218                     |
| <b>Figure 4D, Sustained <math>[Ca^{2+}]_i</math> (nM), 4 min after His application</b>         |      |     |                         |
|                                                                                                | Mean | SEM | <i>n</i> (cell numbers) |

|                                                                                             |      |     |                         |
|---------------------------------------------------------------------------------------------|------|-----|-------------------------|
| 100 $\mu$ M histamine in Ca <sub>2</sub>                                                    | 115  | 2   | 813                     |
| 100 $\mu$ M His in Ca <sub>2</sub> , Gd <sup>3+</sup>                                       | 54   | 3   | 65                      |
| 100 $\mu$ M His in Ca <sub>2</sub> , BTP2                                                   | 48   | 2   | 96                      |
| <b>Figure 5G, Peak [Ca<sup>2+</sup>]<sub>i</sub> (nM) with TG</b>                           |      |     |                         |
|                                                                                             | Mean | SEM | <i>n</i> (cell numbers) |
| Control                                                                                     | 223  | 7   | 337                     |
| Non-targeting siRNA                                                                         | 190  | 11  | 163                     |
| STIM1 siRNA                                                                                 | 59   | 8   | 132                     |
| <b>Figure 5H, Sustained [Ca<sup>2+</sup>]<sub>i</sub> (nM), 4 min after His application</b> |      |     |                         |
|                                                                                             | Mean | SEM | <i>n</i> (cell numbers) |
| Control                                                                                     | 115  | 2   | 813                     |
| Non-targeting siRNA                                                                         | 93   | 5   | 107                     |
| STIM1 siRNA                                                                                 | 40   | 4   | 135                     |
| <b>Figure 7D, Peak [Ca<sup>2+</sup>]<sub>i</sub> (nM) with TG</b>                           |      |     |                         |
|                                                                                             | Mean | SEM | <i>n</i> (cell numbers) |
| eGFP                                                                                        | 205  | 16  | 44                      |
| eGFP-Orai1-E106A                                                                            | 34   | 3   | 34                      |
| eGFP-Orai1-R91W                                                                             | 83   | 8   | 24                      |
| <b>Figure 7H, Sustained [Ca<sup>2+</sup>]<sub>i</sub> (nM), 4 min after His application</b> |      |     |                         |
|                                                                                             | Mean | SEM | <i>n</i> (cell numbers) |
| eGFP                                                                                        | 130  | 7   | 65                      |
| eGFP-Orai1-E106A                                                                            | 27   | 5   | 31                      |
| eGFP-Orai1-R91W                                                                             | 63   | 6   | 32                      |
| <b>Figure 8C, Peak [Ca<sup>2+</sup>]<sub>i</sub> (nM) with TG</b>                           |      |     |                         |
|                                                                                             | Mean | SEM | <i>n</i> (cell numbers) |
| eGFP                                                                                        | 205  | 16  | 44                      |
| STIM1 + eGFP-Orai1                                                                          | 948  | 64  | 31                      |
| <b>Figure 8F, Sustained [Ca<sup>2+</sup>]<sub>i</sub> (nM), 4 min after His application</b> |      |     |                         |
|                                                                                             | Mean | SEM | <i>n</i> (cell numbers) |
| eGFP                                                                                        | 130  | 7   | 65                      |
| STIM1 + eGFP-Orai1                                                                          | 806  | 44  | 16                      |
| <b>Figure 9L, Nuclear translocation of NFAT (% of total cells)</b>                          |      |     |                         |

|                                                       | Mean | SEM | <i>n</i> (cell numbers) |
|-------------------------------------------------------|------|-----|-------------------------|
| Control                                               | 7    | 4   | 85                      |
| 100 $\mu$ M histamine in Ca <sub>2</sub>              | 95   | 2   | 139                     |
| 100 $\mu$ M His in Ca <sub>2</sub> , FEX              | 14   | 10  | 54                      |
| 100 $\mu$ M His in Ca <sub>0</sub>                    | 10   | 10  | 53                      |
| 100 $\mu$ M His in Ca <sub>2</sub> , CsA              | 2    | 2   | 50                      |
| 100 $\mu$ M His in Ca <sub>2</sub> , Gd <sup>3+</sup> | 16   | 9   | 46                      |
| 100 $\mu$ M His in Ca <sub>2</sub> , STIM1 siRNA      | 30   | 4   | 38                      |
| 100 $\mu$ M His in Ca <sub>2</sub> , Orai1 siRNA      | 23   | 9   | 51                      |

**Figure 11B**, IL-8 (ng/ml)

|                              | Mean | SEM  | <i>n</i> (exp. numbers) |
|------------------------------|------|------|-------------------------|
| Control                      | 0.55 | 0.03 | 3                       |
| 100 $\mu$ M histamine        | 1.84 | 0.09 | 3                       |
| 100 $\mu$ M His, CsA         | 0.57 | 0.05 | 3                       |
| 100 $\mu$ M His, Orai1 siRNA | 0.89 | 0.05 | 3                       |
| 100 $\mu$ M His, STIM1 siRNA | 0.73 | 0.04 | 3                       |

**A**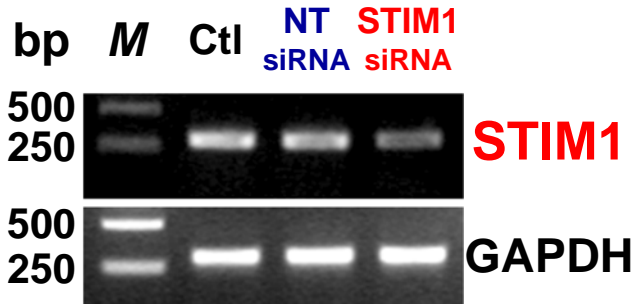**B**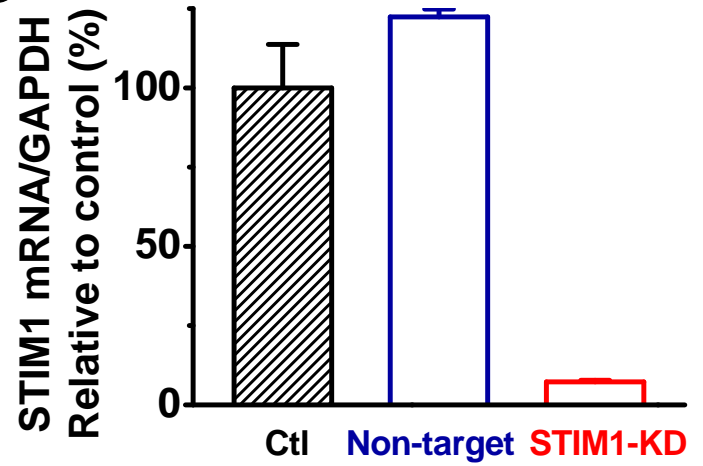**C**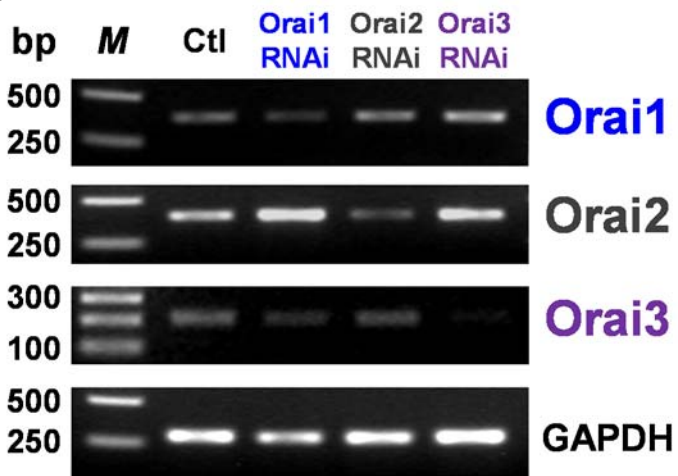**D**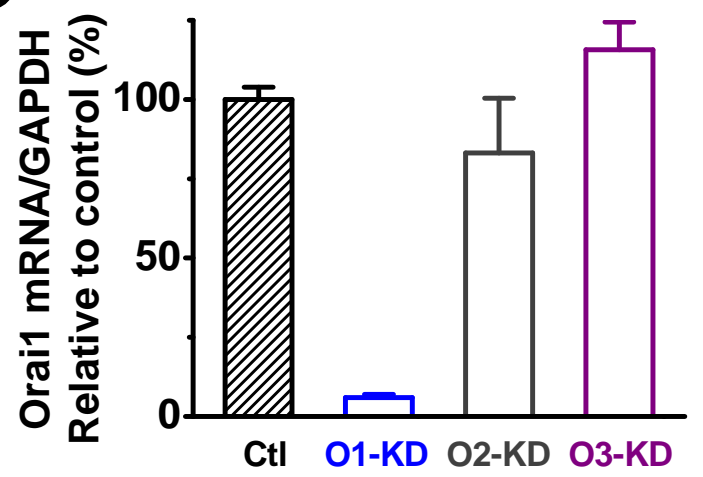**E**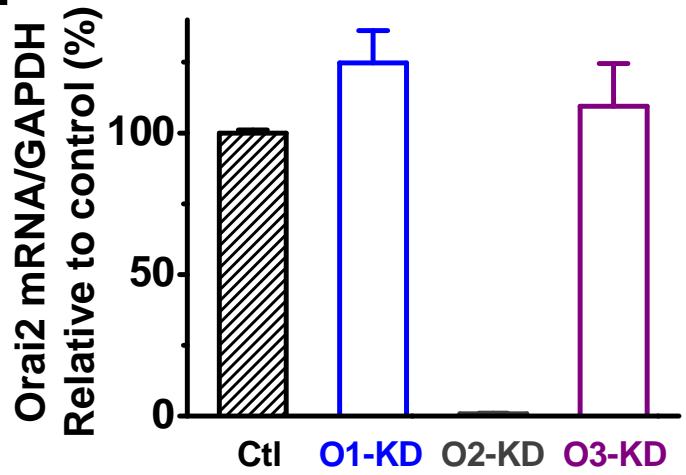**F**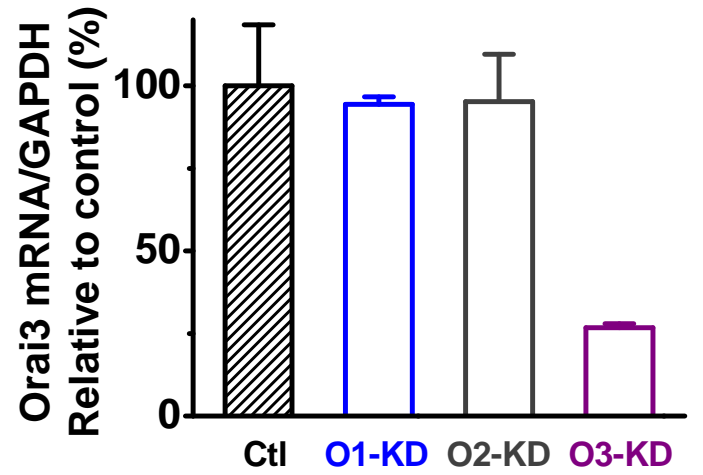

Figure S1

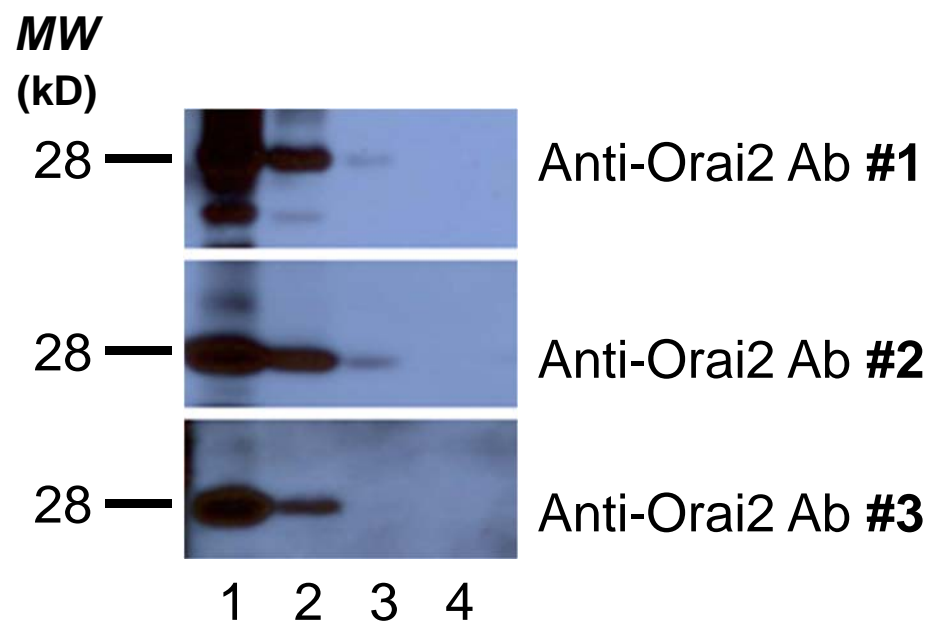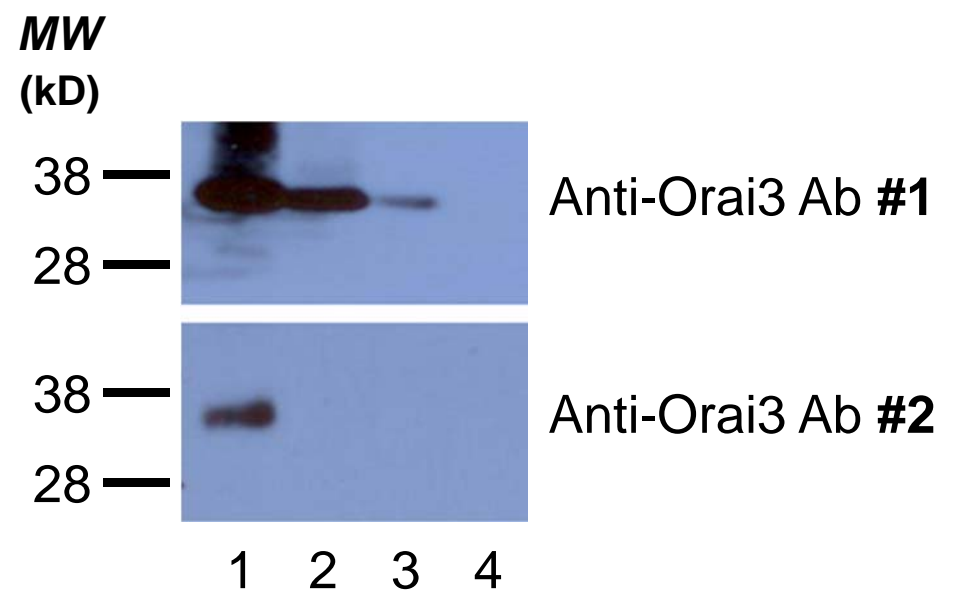

Figure S2
